# Supplementary material
Source: publisher figshare collection journal article supplement (https://frontiersin.figshare.com/ndownloader/files/18003125)

## Supplementary Material

# Neural Activity and Decoding of Action Observation Using Combined EEG and fNIRS Measurement

Sheng Ge, Peng Wang, Hui Liu, Pan Lin, Junfeng Gao, Ruimin Wang, Keiji Iramina, Quan Zhang, Wenming Zheng\*

\* **Correspondence:** Wenming Zheng: wenming\_zheng@seu.edu.cn

## 1. Supplementary Figures

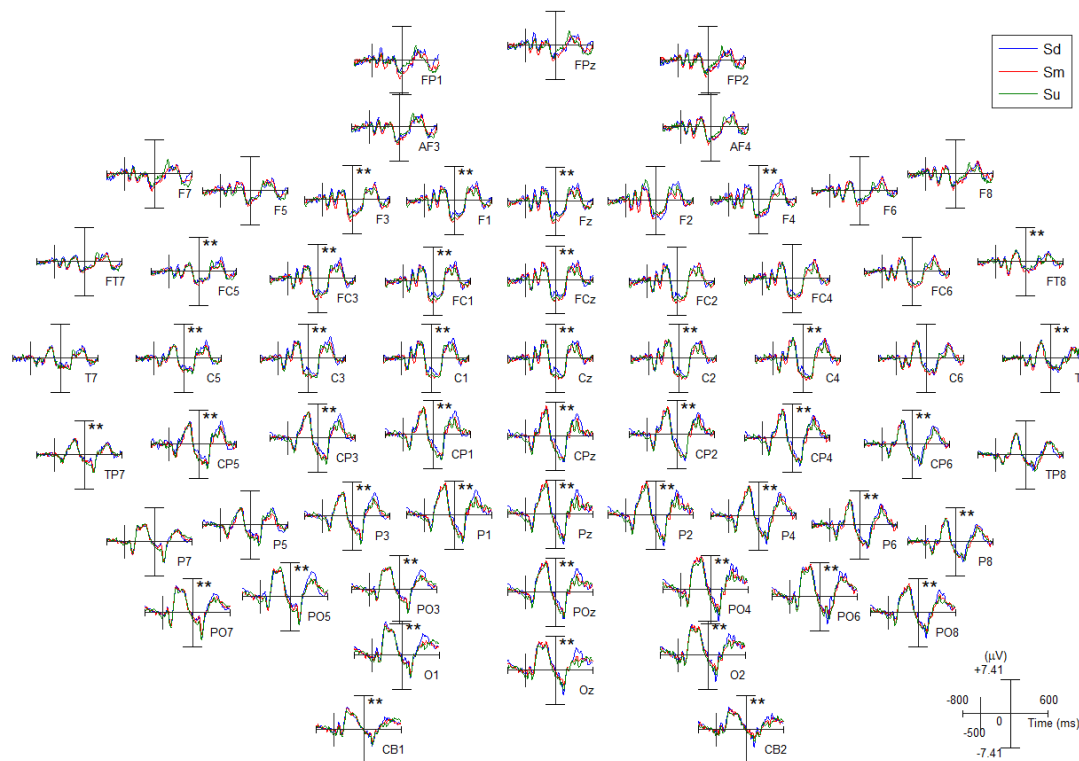

**Supplementary Figure 1.** The averaged ERP waveforms of all EEG channels for the Sd, Sm, and Su intentions for all participants. 

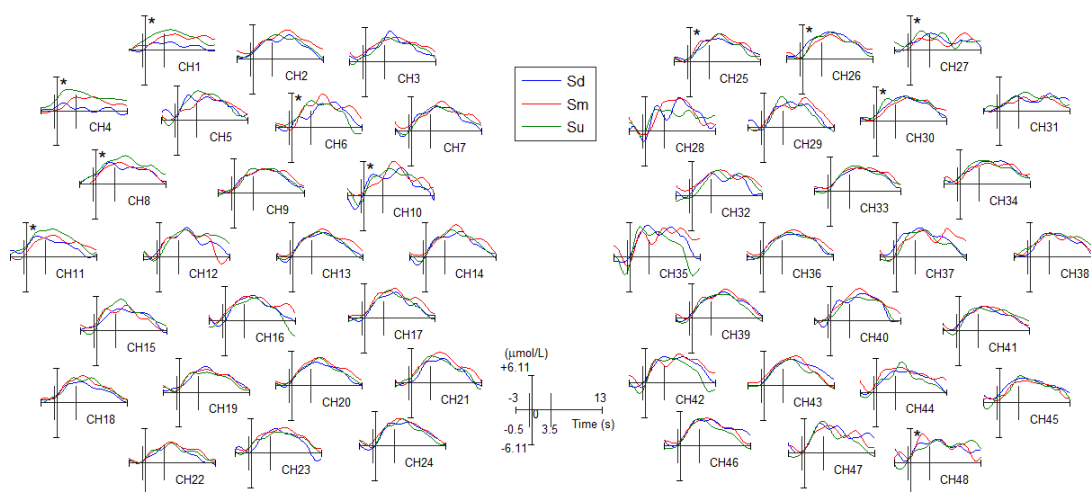

**Supplementary Figure 2.** The averaged HbO waveforms of all fNIRS channels for the Sd, Sm, and Su intentions for all participants. 

Supplement: Supplementary file [file 18003125]
